# Supplementary material
Source: Elsevier journal article supplement (https://comptes-rendus.academie-sciences.fr/biologies/article/10.1016/j.crvi.2010.09.003/file/attach/mmc1.pdf)
Supplement: mmc1 [file mmc1.pdf]

## Supplementary Material

System of ordinary differential equations of the genetic regulatory network of Figure 4.

$$\begin{aligned}
 HB'[t] &= -HB[t]d_{HB} + \left(p_0^{BCD\$}\right)_{HB}HB_0^{BCD\$}[t] + \left(p_{KNI}^{BCD\$}\right)_{HB}HB_{KNI}^{BCD\$}[t] \\
 &- HB[t]kni_{hb}KNI_{0,0}^0[t] - HB[t]kni_{hb}KNI_{0,0}^{BCD\$}[t] \\
 &- HB[t]kni_{hb}KNI_{0,TLL\$}^0[t] - HB[t]kni_{hb}KNI_{0,TLL\$}^{BCD\$}[t] \\
 &+ kni_{-hb}KNI_{HB,0}^0[t] + kni_{-hb}KNI_{HB,0}^{BCD\$}[t] + kni_{-hb}KNI_{HB,TLL\$}^0[t] \\
 &+ kni_{-hb}KNI_{HB,TLL\$}^{BCD\$}[t] \\
 KNI'[t] &= -KNI[t]d_{KNI} - KNI[t]hb_{kni}HB_0^0[t] - KNI[t]hb_{kni}HB_0^{BCD\$}[t] \\
 &+ hb_{-kni}HB_{KNI}^0[t] + hb_{-kni}HB_{KNI}^{BCD\$}[t] + \left(p_{0,0}^{BCD\$}\right)_{KNI}KNI_{0,0}^{BCD\$}[t] \\
 &+ \left(p_{0,TLL\$}^{BCD\$}\right)_{KNI}KNI_{0,TLL\$}^{BCD\$}[t] + \left(p_{HB,0}^{BCD\$}\right)_{KNI}KNI_{HB,0}^{BCD\$}[t] \\
 &+ \left(p_{HB,TLL\$}^{BCD\$}\right)_{KNI}KNI_{HB,TLL\$}^{BCD\$}[t] \\
 \left(HB_0^0\right)'[t] &= -BCD\$hb_{bcd\$}HB_0^0[t] - KNI[t]hb_{kni}HB_0^0[t] \\
 &+ hb_{-bcd\$}HB_0^{BCD\$}[t] + hb_{-kni}HB_{KNI}^0[t] \\
 \left(HB_0^{BCD\$}\right)'[t] &= BCD\$hb_{bcd\$}HB_0^0[t] - hb_{-bcd\$}HB_0^{BCD\$}[t] \\
 &- KNI[t]hb_{kni}HB_0^{BCD\$}[t] + hb_{-kni}HB_{KNI}^{BCD\$}[t] \\
 \left(HB_{KNI}^0\right)'[t] &= KNI[t]hb_{kni}HB_0^0[t] - BCD\$hb_{bcd\$}HB_{KNI}^0[t] \\
 &- hb_{-kni}HB_{KNI}^0[t] + hb_{-bcd\$}HB_{KNI}^{BCD\$}[t] \\
 \left(HB_{KNI}^{BCD\$}\right)'[t] &= KNI[t]hb_{kni}HB_0^{BCD\$}[t] + BCD\$hb_{bcd\$}HB_{KNI}^0[t] \\
 &- hb_{-bcd\$}HB_{KNI}^{BCD\$}[t] - hb_{-kni}HB_{KNI}^{BCD\$}[t] \\
 \left(KNI_{0,0}^0\right)'[t] &= -BCD\$kni_{bcd\$}KNI_{0,0}^0[t] - HB[t]kni_{hb}KNI_{0,0}^0[t] \\
 &- TLL\$kni_{tll\$}KNI_{0,0}^0[t] + kni_{-bcd\$}KNI_{0,0}^{BCD\$}[t] \\
 &+ kni_{-tll\$}KNI_{0,TLL\$}^0[t] + kni_{-hb}KNI_{HB,0}^0[t]
 \end{aligned}$$

$$\begin{aligned}
(KNI_{0,0}^{BCD\$})' [t] &= BCD\$kni_{bcd\$}KNI_{0,0}^0[t] - kni_{-bcd\$}KNI_{0,0}^{BCD\$}[t] \\
&- HB[t]kni_{hb}KNI_{0,0}^{BCD\$}[t] \\
&- TLL\$kni_{tll\$}KNI_{0,0}^{BCD\$}[t] + kni_{-tll\$}KNI_{0,TLL\$}^{BCD\$}[t] \\
&+ kni_{-hb}KNI_{HB,0}^{BCD\$}[t] \\
(KNI_{0,TLL\$}^0)' [t] &= TLL\$kni_{tll\$}KNI_{0,0}^0[t] - BCD\$kni_{bcd\$}KNI_{0,TLL\$}^0[t] \\
&- HB[t]kni_{hb}KNI_{0,TLL\$}^0[t] - kni_{-tll\$}KNI_{0,TLL\$}^0[t] \\
&+ kni_{-bcd\$}KNI_{0,TLL\$}^{BCD\$}[t] + kni_{-hb}KNI_{HB,TLL\$}^0[t] \\
(KNI_{0,TLL\$}^{BCD\$})' [t] &= TLL\$kni_{tll\$}KNI_{0,0}^{BCD\$}[t] + BCD\$kni_{bcd\$}KNI_{0,TLL\$}^0[t] \\
&- kni_{-bcd\$}KNI_{0,TLL\$}^{BCD\$}[t] - HB[t]kni_{hb}KNI_{0,TLL\$}^{BCD\$}[t] \\
&- kni_{-tll\$}KNI_{0,TLL\$}^{BCD\$}[t] + kni_{-hb}KNI_{HB,TLL\$}^{BCD\$}[t] \\
(KNI_{HB,0}^0)' [t] &= HB[t]kni_{hb}KNI_{0,0}^0[t] - BCD\$kni_{bcd\$}KNI_{HB,0}^0[t] \\
&- kni_{-hb}KNI_{HB,0}^0[t] \\
&- TLL\$kni_{tll\$}KNI_{HB,0}^0[t] \\
&+ kni_{-bcd\$}KNI_{HB,0}^{BCD\$}[t] + kni_{-tll\$}KNI_{HB,TLL\$}^0[t] \\
(KNI_{HB,0}^{BCD\$})' [t] &= HB[t]kni_{hb}KNI_{0,0}^{BCD\$}[t] + BCD\$kni_{bcd\$}KNI_{HB,0}^0[t] \\
&- kni_{-bcd\$}KNI_{HB,0}^{BCD\$}[t] - kni_{-hb}KNI_{HB,0}^{BCD\$}[t] \\
&- TLL\$kni_{tll\$}KNI_{HB,0}^{BCD\$}[t] + kni_{-tll\$}KNI_{HB,TLL\$}^{BCD\$}[t] \\
(KNI_{HB,TLL\$}^0)' [t] &= HB[t]kni_{hb}KNI_{0,TLL\$}^0[t] + TLL\$kni_{tll\$}KNI_{HB,0}^0[t] \\
&- BCD\$kni_{bcd\$}KNI_{HB,TLL\$}^0[t] - kni_{-hb}KNI_{HB,TLL\$}^0[t] \\
&- kni_{-tll\$}KNI_{HB,TLL\$}^0[t] + kni_{-bcd\$}KNI_{HB,TLL\$}^{BCD\$}[t] \\
(KNI_{HB,TLL\$}^{BCD\$})' [t] &= HB[t]kni_{hb}KNI_{0,TLL\$}^{BCD\$}[t] + TLL\$kni_{tll\$}KNI_{HB,0}^{BCD\$}[t] \\
&+ BCD\$kni_{bcd\$}KNI_{HB,TLL\$}^0[t] - kni_{-bcd\$}KNI_{HB,TLL\$}^{BCD\$}[t] \\
&- kni_{-hb}KNI_{HB,TLL\$}^{BCD\$}[t] - kni_{-tll\$}KNI_{HB,TLL\$}^{BCD\$}[t]
\end{aligned} \tag{1}$$

The conservation laws of the system of ordinary differential equations (1) are,

$$\begin{aligned}
GC_{KNI} &= KNI_{HB,TLL\$}^{BCD\$}[t] + KNI_{HB,0}^{BCD\$}[t] + KNI_{0,TLL\$}^{BCD\$}[t] + KNI_{0,0}^{BCD\$}[t] \\
&+ KNI_{HB,TLL\$}^0[t] + KNI_{HB,0}^0[t] + KNI_{0,TLL\$}^0[t] + KNI_{0,0}^0[t] \\
GC_{HB} &= HB_{KNI}^{BCD\$}[t] + HB_0^{BCD\$}[t] + HB_{KNI}^0[t] + HB_0^0[t]
\end{aligned} \tag{2}$$

The symbols  $TLL\$$  and  $BCD\$$  represent the concentration of TLL and BCD. In fact,  $TLL\$ \equiv TLL\$(x)$  and  $BCD\$ \equiv BCD\$(x)$ , where  $x$  is the coordinate along the antero-posterior axis of the *Drosophila* embryo.

The parameter values of the system of equations (1) for the fits in Figure 5, obtained by multi-objective optimization technique, and are shown in the table below.

|                                   |                                    |                                  |
|-----------------------------------|------------------------------------|----------------------------------|
| $hb_{bcd} = 1.141$                | $hb_{kni} = 0.035$                 | $kni_{bcd} = 0.706$              |
| $kni_{hb} = 1.956$                | $kni_{tll} = 0.087$                | $hb_{bcd} = 1.000$               |
| $hb_{kni} = 0.001$                | $kni_{bcd} = 0.100$                | $kni_{hb} = 0.003$               |
| $kni_{tll} = 0.265$               | $(p_0^{BCD\$})_{HB} = 1.954$       | $(p_{KNI}^{BCD\$})_{HB} = 0.000$ |
| $(p_{0,0}^{BCD\$})_{KNI} = 2.351$ | $(p_{HB,0}^{BCD\$})_{KNI} = 0.004$ | $(p_{0,TLL\$})_{KNI} = 2.065$    |
| $(p_{HB,TLL\$})_{KNI} = 0.0196$   | $d_{HB} = 0.000$                   | $d_{KNI} = 0.136$                |
| $\alpha_{hb} = 0.100$             | $\alpha_{kni} = 2.000$             | $Time = 10.000$                  |
| $GC_{HB} = 273.236$               | $GC_{KNI} = 325.558$               |                                  |

Table 1: Parameter values of the fits shown in Figure 5. The first 18 parameters are the free parameters of the differential equation model 1. The parameter  $t^*$  is the total integration time of the system of differential equations. The parameters  $\alpha_{hb}$  and  $\alpha_{kni}$  are scale factors that multiply the differential equation solutions  $HB(t^*)$  and  $KNI(t^*)$ , in order to avoid biasing of data. Note that experimental data obtained by fluorescent methods indicate a concentration that is proportional to the actual concentration of  $HB$  and  $KNI$  proteins, and these scaling factors are unknown and are different for each protein. The constants  $GC_{HB}$  and  $GC_{KNI}$  are the total gene concentrations that are responsible for the transcription and translation of proteins  $HB$  and  $KNI$  (conservation laws (2)).

System of ordinary differential equations of the genetic regulatory network of Figure 6.

$$\begin{aligned}
HB'[t] &= -HB[t]kni_{hb}KNI_{0,TLL}^{BCD}[t] + kni_{-hb}KNI_{HB,TLL}^{BCD}[t] \\
&- HB(t)kni_{hb}KNI_{0,0}^{BCD}[t] + kni_{-hb}KNI_{HB,0}^{BCD}[t] \\
&+ \left(p_{KNI,HKB}^{BCD}\right)_{HB}HB_{KNI,HKB}^{BCD}[t] + \left(p_{0,HKB}^{BCD}\right)_{HB}HB_{0,HKB}^{BCD}[t] \\
&+ \left(p_{KNI,0}^{BCD}\right)_{HB}HB_{KNI,0}^{BCD}[t] + \left(p_{0,0}^{BCD}\right)_{HB}HB_{0,0}^{BCD}[t] \\
&- HB[t]kni_{hb}KNI_{0,TLL}^0[t] + kni_{-hb}KNI_{HB,TLL}^0[t] \\
&- HB[t]kni_{hb}KNI_{0,0}^0[t] + kni_{-hb}KNI_{HB,0}^0[t] - d_{HB}HB[t] \\
KNI'[t] &= -KNI[t]hb_{kni}HB_{0,HKB}^{BCD}[t] + hb_{-kni}HB_{KNI,HKB}^{BCD}[t] \\
&- KNI[t]hb_{kni}HB_{0,0}^{BCD}[t] + hb_{-kni}HB_{KNI,0}^{BCD}[t] \\
&+ \left(p_{HB,TLL}^{BCD}\right)_{KNI}KNI_{HB,TLL}^{BCD}[t] + \left(p_{HB,0}^{BCD}\right)_{KNI}KNI_{HB,0}^{BCD}[t] \\
&+ \left(p_{0,TLL}^{BCD}\right)_{KNI}KNI_{0,TLL}^{BCD}[t] + \left(p_{0,0}^{BCD}\right)_{KNI}KNI_{0,0}^{BCD}[t] \\
&- KNI[t]hb_{kni}HB_{0,HKB}^0[t] + hb_{-kni}HB_{KNI,HKB}^0[t] \\
&- KNI[t]hb_{kni}HB_{0,0}^0[t] + hb_{-kni}HB_{KNI,0}^0[t] - d_{KNI}KNI[t] \\
(HB_{0,0}^0)'[t] &= -BCD\$hb_{bcd}HB_{0,0}^0[t] + hb_{-bcd}HB_{0,0}^{BCD}[t] - \mathbf{HKB}hb_{hkb}HB_{0,0}^0[t] \\
&+ hb_{-hkb}HB_{0,HKB}^0[t] - KNI[t]hb_{kni}HB_{0,0}^0[t] + hb_{-kni}HB_{KNI,0}^0[t] \\
(HB_{0,0}^{BCD})'[t] &= BCD\$hb_{bcd}HB_{0,0}^0[t] - hb_{-bcd}HB_{0,0}^{BCD}[t] - \mathbf{HKB}hb_{hkb}HB_{0,0}^{BCD}[t] \\
&+ hb_{-hkb}HB_{0,HKB}^{BCD}[t] - KNI[t]hb_{kni}HB_{0,0}^{BCD}[t] + hb_{-kni}HB_{KNI,0}^{BCD}[t] \\
(HB_{0,HKB}^0)'[t] &= -BCD\$hb_{bcd}HB_{0,HKB}^0[t] + hb_{-bcd}HB_{0,HKB}^{BCD}[t] \\
&+ \mathbf{HKB}hb_{hkb}HB_{0,0}^0[t] - hb_{-hkb}HB_{0,HKB}^0[t] \\
&- KNI[t]hb_{kni}HB_{0,HKB}^0[t] + hb_{-kni}HB_{KNI,HKB}^0[t] \\
(HB_{0,HKB}^{BCD})'[t] &= BCD\$hb_{bcd}HB_{0,HKB}^0[t] - hb_{-bcd}HB_{0,HKB}^{BCD}[t] \\
&+ \mathbf{HKB}hb_{hkb}HB_{0,0}^{BCD}[t] - hb_{-hkb}HB_{0,HKB}^{BCD}[t] \\
&- KNI[t]hb_{kni}HB_{0,HKB}^{BCD}[t] + hb_{-kni}HB_{KNI,HKB}^{BCD}[t] \\
(HB_{KNI,0}^0)'[t] &= -BCD\$hb_{bcd}HB_{KNI,0}^0[t] + hb_{-bcd}HB_{KNI,0}^{BCD}[t] \\
&- \mathbf{HKB}hb_{hkb}HB_{KNI,0}^0[t] + hb_{-hkb}HB_{KNI,HKB}^0[t] \\
&+ KNI(t)hb_{kni}HB_{0,0}^0[t] - hb_{-kni}HB_{KNI,0}^0[t] \\
(HB_{KNI,0}^{BCD})'[t] &= BCD\$hb_{bcd}HB_{KNI,0}^0[t] - hb_{-bcd}HB_{KNI,0}^{BCD}[t] \\
&- \mathbf{HKB}hb_{hkb}HB_{KNI,0}^{BCD}[t] + hb_{-hkb}HB_{KNI,HKB}^{BCD}[t] \\
&+ KNI[t]hb_{kni}HB_{0,0}^{BCD}[t] - hb_{-kni}HB_{KNI,0}^{BCD}[t]
\end{aligned}$$

$$\begin{aligned}
(HB_{KNI,HKB}^0)' [t] &= -BCD\$hb_{bcd}\$HB_{KNI,HKB}^0[t] + hb_{-bcd}\$HB_{KNI,HKB}^{BCD\$}[t] \\
&+ \mathbf{HKB}\$hb_{hkb}\$HB_{KNI,0}^0[t] - hb_{-hkb}\$HB_{KNI,HKB}^0[t] \\
&+ KNI[t]hb_{kni}\$HB_{0,HKB}^0[t] - hb_{-kni}\$HB_{KNI,HKB}^0[t] \\
(HB_{KNI,HKB}^{BCD\$})' [t] &= BCD\$hb_{bcd}\$HB_{KNI,HKB}^0[t] - hb_{-bcd}\$HB_{KNI,HKB}^{BCD\$}[t] \\
&+ \mathbf{HKB}\$hb_{hkb}\$HB_{KNI,0}^{BCD\$}[t] - hb_{-hkb}\$HB_{KNI,HKB}^{BCD\$}[t] \\
&+ KNI[t]hb_{kni}\$HB_{0,HKB}^{BCD\$}[t] - hb_{-kni}\$HB_{KNI,HKB}^{BCD\$}[t] \\
(KNI_{0,0}^0)' [t] &= -BCD\$kni_{bcd}\$KNI_{0,0}^0[t] + kni_{-bcd}\$KNI_{0,0}^{BCD\$}[t] \\
&- HB[t]kni_{hb}\$KNI_{0,0}^0[t] + kni_{-hb}\$KNI_{HB,0}^0[t] \\
&- TLL\$kni_{tl}\$KNI_{0,0}^0[t] + kni_{-tl}\$KNI_{0,TLL}^0[t] \\
(KNI_{0,0}^{BCD\$})' [t] &= BCD\$kni_{bcd}\$KNI_{0,0}^0[t] - kni_{-bcd}\$KNI_{0,0}^{BCD\$}[t] \\
&- HB[t]kni_{hb}\$KNI_{0,0}^{BCD\$}[t] + kni_{-hb}\$KNI_{HB,0}^{BCD\$}[t] \\
&- TLL\$kni_{tl}\$KNI_{0,0}^{BCD\$}[t] + kni_{-tl}\$KNI_{0,TLL}^{BCD\$}[t] \\
(KNI_{0,TLL}^0)' [t] &= -BCD\$kni_{bcd}\$KNI_{0,TLL}^0[t] + kni_{-bcd}\$KNI_{0,TLL}^{BCD\$}[t] \\
&- HB[t]kni_{hb}\$KNI_{0,TLL}^0[t] + kni_{-hb}\$KNI_{HB,TLL}^0[t] \\
&+ TLL\$kni_{tl}\$KNI_{0,0}^0[t] - kni_{-tl}\$KNI_{0,TLL}^0[t] \\
(KNI_{0,TLL}^{BCD\$})' [t] &= BCD\$kni_{bcd}\$KNI_{0,TLL}^0[t] - kni_{-bcd}\$KNI_{0,TLL}^{BCD\$}[t] \\
&- HB[t]kni_{hb}\$KNI_{0,TLL}^{BCD\$}[t] + kni_{-hb}\$KNI_{HB,TLL}^{BCD\$}[t] \\
&+ TLL\$kni_{tl}\$KNI_{0,0}^{BCD\$}[t] - kni_{-tl}\$KNI_{0,TLL}^{BCD\$}[t] \\
(KNI_{HB,0}^0)' [t] &= -BCD\$kni_{bcd}\$KNI_{HB,0}^0[t] + kni_{-bcd}\$KNI_{HB,0}^{BCD\$}[t] \\
&+ HB[t]kni_{hb}\$KNI_{0,0}^0[t] - kni_{-hb}\$KNI_{HB,0}^0[t] \\
&- TLL\$kni_{tl}\$KNI_{HB,0}^0[t] + kni_{-tl}\$KNI_{HB,TLL}^0[t] \\
(KNI_{HB,0}^{BCD\$})' [t] &= BCD\$kni_{bcd}\$KNI_{HB,0}^0[t] - kni_{-bcd}\$KNI_{HB,0}^{BCD\$}[t] \\
&+ HB[t]kni_{hb}\$KNI_{0,0}^{BCD\$}[t] - kni_{-hb}\$KNI_{HB,0}^{BCD\$}[t] \\
&- TLL\$kni_{tl}\$KNI_{HB,0}^{BCD\$}[t] + kni_{-tl}\$KNI_{HB,TLL}^{BCD\$}[t] \\
(KNI_{HB,TLL}^0)' [t] &= -BCD\$kni_{bcd}\$KNI_{HB,TLL}^0[t] + kni_{-bcd}\$KNI_{HB,TLL}^{BCD\$}[t] \\
&+ HB[t]kni_{hb}\$KNI_{0,TLL}^0[t] - kni_{-hb}\$KNI_{HB,TLL}^0[t] \\
&+ TLL\$kni_{tl}\$KNI_{HB,0}^0[t] - kni_{-tl}\$KNI_{HB,TLL}^0[t] \\
(KNI_{HB,TLL}^{BCD\$})' [t] &= BCD\$kni_{bcd}\$KNI_{HB,TLL}^0[t] - kni_{-bcd}\$KNI_{HB,TLL}^{BCD\$}[t] \\
&+ HB[t]kni_{hb}\$KNI_{0,TLL}^{BCD\$}[t] - kni_{-hb}\$KNI_{HB,TLL}^{BCD\$}[t] \\
&+ TLL\$kni_{tl}\$KNI_{HB,0}^{BCD\$}[t] - kni_{-tl}\$KNI_{HB,TLL}^{BCD\$}[t]
\end{aligned} \tag{3}$$

Equations (1) and (3) differ by the HKB\\$ terms and the associated operon forms. The HKB\\$ terms are represented in bold.

The conservation laws of the system of ordinary differential equations (3) are,

$$\begin{aligned}
GC_{KNI} &= KNI_{HB,TLL}^{BCD}[t] + KNI_{HB,0}^{BCD}[t] + KNI_{0,TLL}^{BCD}[t] + KNI_{0,0}^{BCD}[t] \\
&+ KNI_{HB,TLL}^0[t] + KNI_{HB,0}^0[t] + KNI_{0,TLL}^0[t] + KNI_{0,0}^0[t] \\
GC_{HB} &= HB_{KNI,HKB}^{BCD}[t] + HB_{0,HKB}^{BCD}[t] + HB_{KNI,0}^{BCD}[t] + HB_{0,0}^{BCD}[t] \\
&+ HB_{KNI,HKB}^0[t] + HB_{0,HKB}^0[t] + HB_{KNI,0}^0[t] + HB_{0,0}^0[t]
\end{aligned} \tag{4}$$

The parameter values of the system of equations (3) for the fits in Figure 7, obtained by multi-objective optimization technique, are shown in the table below.

|                                    |                                   |                                    |
|------------------------------------|-----------------------------------|------------------------------------|
| $a_1 = 121.870$                    | $a_2 = 296.738$                   | $L_1 = 0.856$                      |
| $L_2 = 0.874$                      | $hb_{bcd} = 0.984$                | $hb_{kni} = 1.558$                 |
| $hb_{hkb} = 1.015$                 | $kni_{bcd} = 4.870$               | $kni_{hb} = 2.866$                 |
| $kni_{tll} = 0.994$                | $hb_{-bcd} = 1.000$               | $hb_{-kni} = 0.127$                |
| $hb_{-hkb} = 0.413$                | $kni_{-bcd} = 0.001$              | $kni_{-hb} = 0.350$                |
| $kni_{-tll} = 0.324$               | $(p_{0,0}^{BCD\$})_{HB} = 81.868$ | $(p_{KNI,0}^{BCD\$})_{HB} = 0.000$ |
| $(p_{0,HKB\$})_{HB} = 71.838$      | $(p_{HB,HKB\$})_{HB} = 6.679$     | $(p_{0,0}^{BCD\$})_{KNI} = 98.934$ |
| $(p_{HB,0}^{BCD\$})_{KNI} = 0.054$ | $(p_{0,TLL\$})_{KNI} = 23.722$    | $(p_{HB,TLL\$})_{KNI} = 0.055$     |
| $d_{HB} = 0.354$                   | $d_{KNI} = 0.191$                 | $\alpha_{HB} = 0.109$              |
| $\alpha_{KNI} = 0.654$             | $t^* = 29.107$                    | $GC_{HB} = 43.979$                 |
| $GC_{KNI} = 21.399$                |                                   |                                    |

Table 2: Parameter values of the fits shown in Figure 7. The first 26 parameters are the free parameters of the differential equation model 3. The parameter  $t^*$  is the total integration time of the system of differential equations. The parameters  $\alpha_{HB}$  and  $\alpha_{KNI}$  are scale factors that multiply the differential equation solutions  $HB(t^*)$  and  $KNI(t^*)$ , in order to avoid biasing of data. Note that experimental data obtained by fluorescent methods indicate a concentration that is proportional to the actual concentration of  $HB$  and  $KNI$  proteins, and these scaling factors are unknown and are different for each protein. The constants  $GC_{HB}$  and  $GC_{KNI}$  are the total gene concentrations that are responsible for the transcription and translation of proteins  $HB$  and  $KNI$ .

Parameter values for the fits in Figure 9 a):

|                                   |                                    |                                  |
|-----------------------------------|------------------------------------|----------------------------------|
| $hb_{bcd} = 1.142$                | $hb_{kni} = 0.034$                 | $kni_{bcd} = 0.709$              |
| $kni_{hb} = 1.954$                | $kni_{tll} = 0.088$                | $hb_{-bcd} = 1.000$              |
| $hb_{-kni} = 0.002$               | $kni_{-bcd} = 0.998$               | $kni_{-hb} = 0.002$              |
| $kni_{-tll} = 0.265$              | $(p_0^{BCD\$})_{HB} = 1.938$       | $(p_{KNI}^{BCD\$})_{HB} = 0.005$ |
| $(p_{0,0}^{BCD\$})_{KNI} = 2.374$ | $(p_{HB,0}^{BCD\$})_{KNI} = 0.002$ | $(p_{0,TLL\$})_{KNI} = 2.051$    |
| $(p_{HB,TLL\$})_{KNI} = 0.014$    | $d_{HB} = 0.004$                   | $d_{KNI} = 0.138$                |
| $\alpha_{hb} = 0.100$             | $\alpha_{kni} = 2.000$             | $t^* = 10.000$                   |
| $GC_{HB} = 273.219$               | $GC_{KNI} = 325.652$               |                                  |

Table 3: Parameter values of the fits shown in Figure 9 a) and system of equations (1).

Parameter values for the fits in Figure 9 b):

|                                   |                                    |                                  |
|-----------------------------------|------------------------------------|----------------------------------|
| $hb_{bcd} = 1.141$                | $hb_{kni} = 0.035$                 | $kni_{bcd} = 0.706$              |
| $kni_{hb} = 1.956$                | $kni_{tll} = 0.087$                | $hb_{-bcd} = 1.000$              |
| $hb_{-kni} = 0.001$               | $kni_{-bcd} = 1.000$               | $kni_{-hb} = 0.003$              |
| $kni_{-tll} = 0.265$              | $(p_0^{BCD\$})_{HB} = 1.954$       | $(p_{KNI}^{BCD\$})_{HB} = 0.000$ |
| $(p_{0,0}^{BCD\$})_{KNI} = 2.351$ | $(p_{HB,0}^{BCD\$})_{KNI} = 0.003$ | $(p_{0,TLL\$})_{KNI} = 2.065$    |
| $(p_{HB,TLL\$})_{KNI} = 0.020$    | $d_{HB} = 0.000$                   | $d_{KNI} = 0.136$                |
| $\alpha_{hb} = 0.100$             | $\alpha_{kni} = 2.000$             | $t^* = 10.000$                   |
| $GC_{HB} = 273.235$               | $GC_{KNI} = 325.558$               |                                  |

Table 4: Parameter values of the fits shown in Figure 9 b) and system of equations (1).
